# Supplementary material for: Enhanced ion transport in nanochannels of MXenes by Mg2+ pre-intercalation
Source: Royal Society of Chemistry journal article supplement (doi:10.1039/d2cp01700h), 2022-01-01
Supplement: d2cp01700h1.pdf [file d2cp01700h1.pdf]

## Supplementary Information

### Enhanced Ion Transport in Nanochannels of MXene by Mg<sup>2+</sup> Pre-Intercalation

Zhiyuan Zhou,<sup>a</sup> Xufeng Hong,<sup>a, b</sup> Huifang Ouyang,<sup>a</sup> Peng Xu,<sup>a</sup> Binbin Shuai,<sup>a</sup> Xiuxiu Wu,<sup>a</sup> Nuo Xu,<sup>a, c</sup> Xinghang Chen,<sup>a</sup> Liang He\*,<sup>d, a, e</sup>

*a. State Key Laboratory of Advanced Technology for Materials Synthesis and Processing, Wuhan University of Technology, Wuhan 430070, P. R. China*

*b. School of Materials Science and Engineering, Peking University, Beijing 100871, P. R. China*

*c. Department of Physics, School of Science, Wuhan University of Technology, Wuhan 430070, P. R. China*

*d. School of Mechanical Engineering, Sichuan University, Chengdu 610065, P. R. China*

*e. Med+X Center for Manufacturing, West China Hospital, Sichuan University, Chengdu 610041, P. R. China*

E-mail: hel20@scu.edu.cn

#### 1. Experiment Section

##### 1.1 Preparation of Ti<sub>3</sub>C<sub>2</sub>T<sub>x</sub> Solution

Ti<sub>3</sub>C<sub>2</sub>T<sub>x</sub> nanosheets were obtained from T<sub>3</sub>AlC<sub>2</sub> MAX phase by selective etching.<sup>1</sup> Specifically, 2.0g MAX phase powder was added into 20 mL 40% HF solution in a Teflon beaker, followed by stirring for 24h at room temperature. After etching by HF solution, the obtained solution was washed several times by ultrapure water (UP water) until its pH value reached 6. Sediment of the centrifuge was dispersed into 20 mL of Tetramethylammonium hydroxide (TMAOH) and stirred at 1600 rpm for 72 h. After intercalation, the TMAOH was washed with UP water, then the sediment was

dispersed into 200 mL UP water. Then the solution was sonicated with Ar bubbling and ice bath at 200 W for 1 h. The dispersion was centrifuged at 2500 rpm for 30 min, and the upper layer was slowly poured out to obtain a colloidal solution of monolayer MXene.

## 1.2 Preparation of MXene Membranes

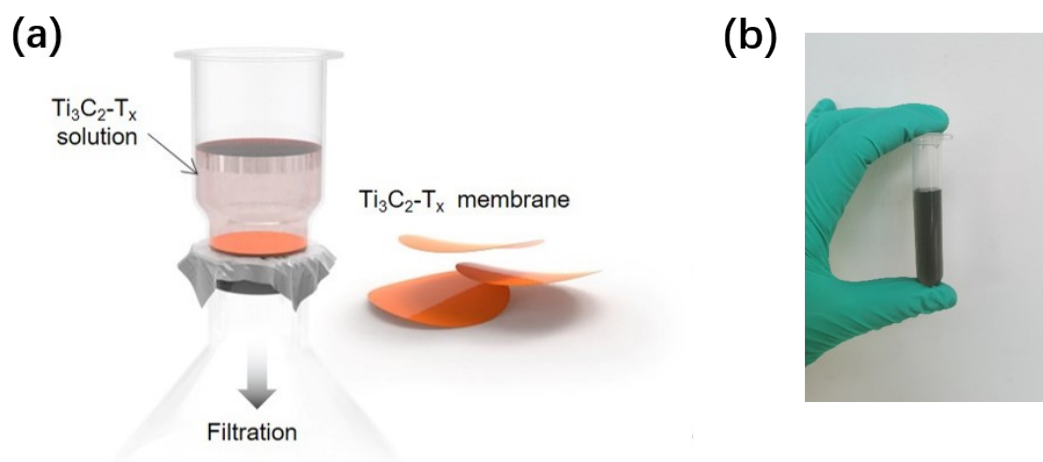

Fig. S1 (a) Schematic diagram preparation of MXene films. (b) Optical photograph of MXene solution at low concentration.

As shown in Fig. S1a, MXene films were obtained by vacuum-assisted filtration using 20 mL  $Ti_3C_2T_x$  solution through a Celgard 3501 polypropylene membrane. Diameter of the films is 46 mm and the mass loading of  $Ti_3C_2T_x$  is 20 mg. Individual MXene film with a diameter of 16 mm was obtained with a mass loading of 1.21 mg.

## 1.3 Pre-Intercalation of MXene Membranes

The MXene film was immersed in 1M chloride salt solutions of different metal cations for 1 h. After immersing, the film was washed by UP water to remove the residual salt solution on its surface. After vacuum drying for 1h, the MXene film intercalated by metal ions was obtained, called as X- $Ti_3C_2T_x$  film (X stands for Li, Na, K, Mg, Ca). To exclude the influence caused by intercalation of other cations, HF solution was used for etching instead of the mixture of LiF and HCl solution in synthesis of MXene solution.

## 2. Characterization

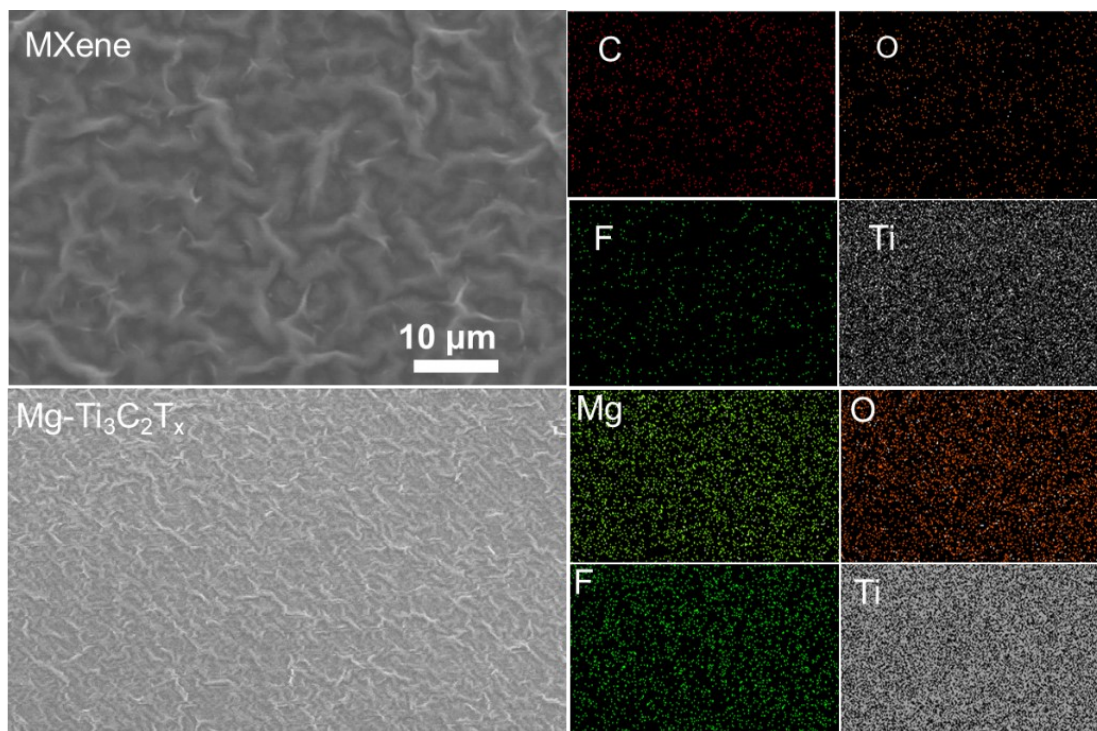

**Fig. S2** SEM and EDS images of the surface of Ti<sub>3</sub>C<sub>2</sub>T<sub>x</sub> film and Mg-Ti<sub>3</sub>C<sub>2</sub>T<sub>x</sub> film.

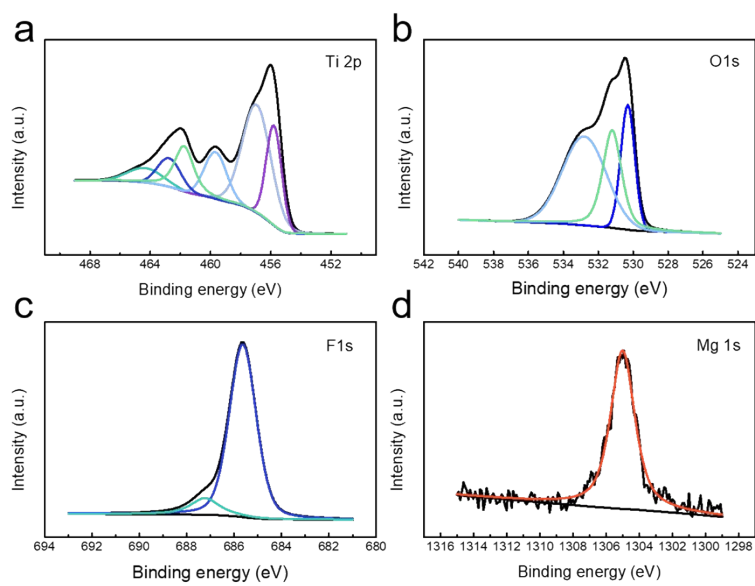

**Fig. S3** XPS spectra of Mg-Ti<sub>3</sub>C<sub>2</sub>T<sub>x</sub> film: (a) Ti, (b) O, (c) F and (d) Mg.

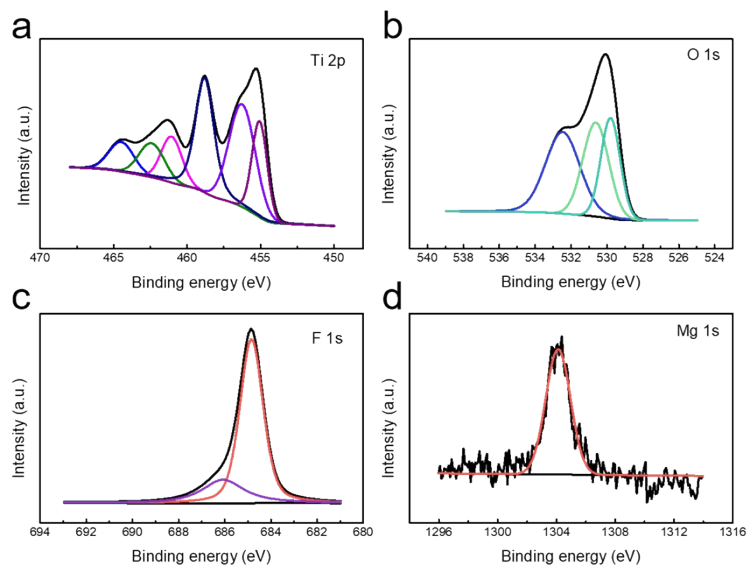

**Fig. S4** XPS spectra of Mg-Ti<sub>3</sub>C<sub>2</sub>T<sub>x</sub>-Li film: (a) Ti, (b) O, (c) F and (d) Mg.

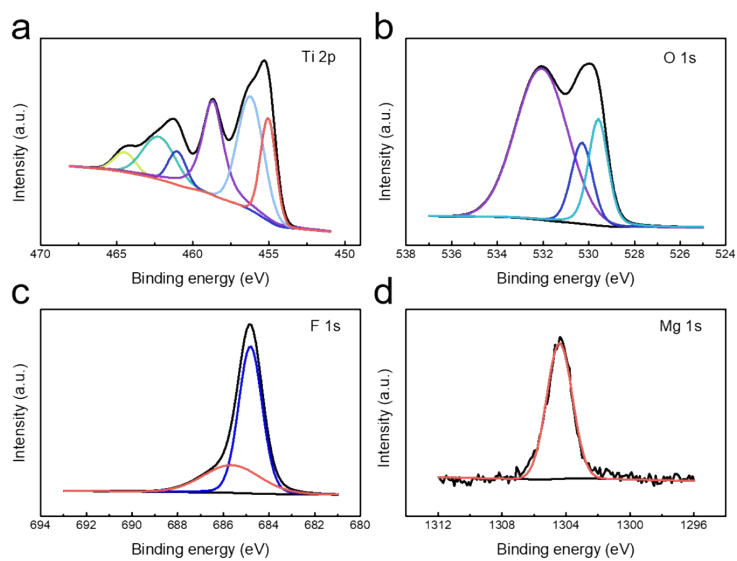

**Fig. S5** XPS spectra of Ti<sub>3</sub>C<sub>2</sub>T<sub>x</sub>-Mg film: (a) Ti, (b) O, (c) F and (d) Mg.

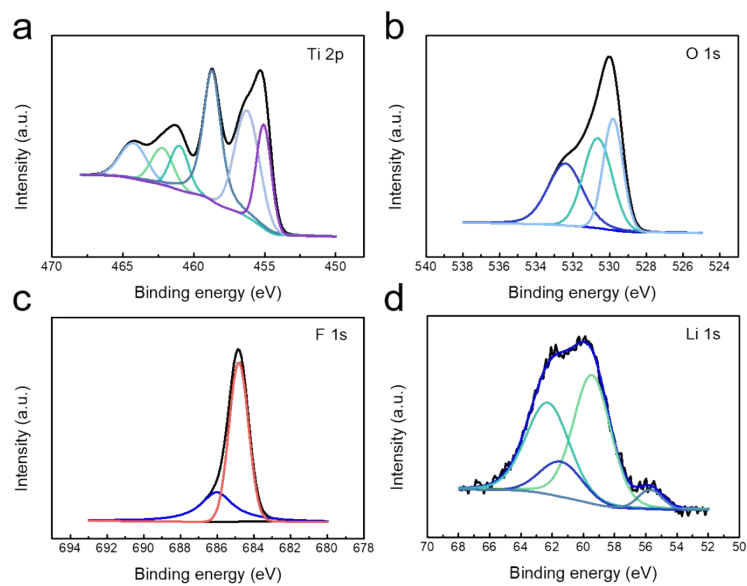

**Fig. S6** XPS spectra of Ti<sub>3</sub>C<sub>2</sub>T<sub>x</sub>-Li film: (a) Ti, (b) O, (c) F and (d) Li.

### 3. Additional Experiment

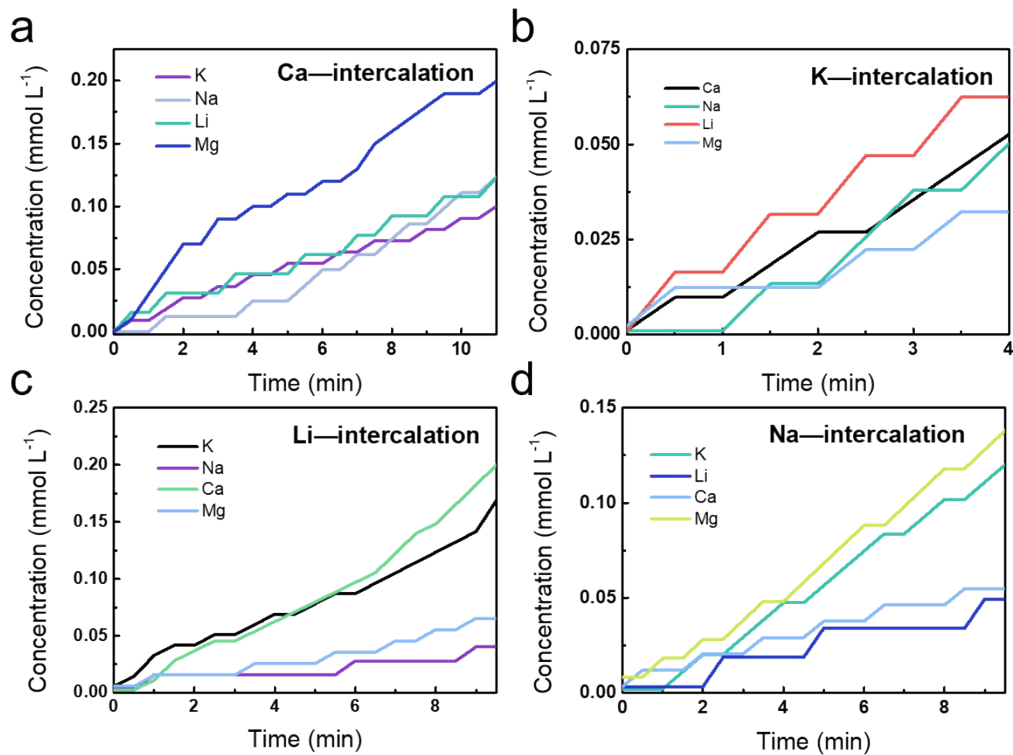

**Fig. S7** Ion transport rate tests of different ions pre-intercalation: (a) Ca-intercalation, (b) K-intercalation, (c) Li-intercalation and (d) Na-intercalation.
